# Supplementary material
Source: PubMed Central journal article supplement (PMC2858245)

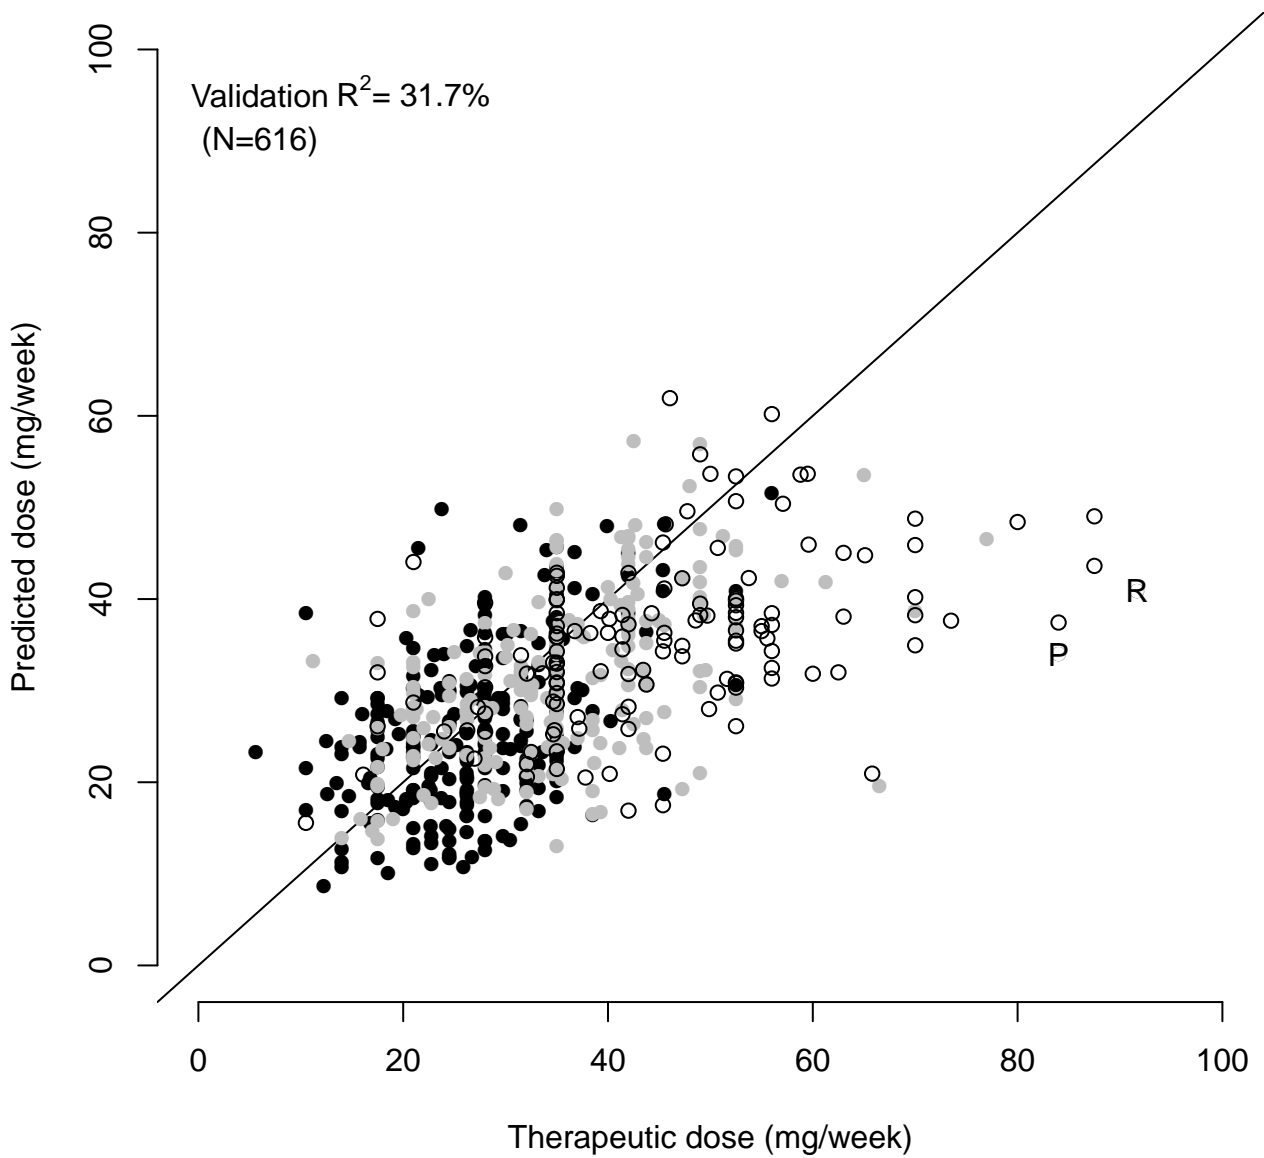

Supplement: NIHMS182961-supplement-Appendix_1.pdf [file NIHMS182961-supplement-Appendix_1.pdf]
